# Supplementary material
Source: publisher figshare collection journal article supplement (https://tandf.figshare.com/articles/dataset/_/7398476)
Supplement: Supplementary file 1 [file 1]

Archive with 2 entries (2 files):
- idre_a_1539777_sm0001.pdf
- idre_a_1539777_sm0000.docx
