# Supplementary material
Source: publisher figshare collection journal article supplement (https://tandf.figshare.com/articles/dataset/_/7398476)
Supplement: Supplementary file 1 [file 1 › idre_a_1539777_sm0000.docx]

Online supplemental file 1

Managing the severely impaired arm after stroke: a mixed-methods study with qualitative emphasis

*** ***, *** ***, *** ***, *** ***

Interview schedule

| **Opening question** | **Prompts** |
| --- | --- |
| Can you tell me a little about yourself | What do you do  What does your typical day/week look like |
| Can you talk about the stroke you had | When did the stroke happen  How did the stroke affect you  How are you getting on at the moment |
| Can you talk about your (stroke-affected) arm and hand | How would you describe your arm/hand  – before the stroke  – how is it different now  What do you think of your arm/hand  How do you feel about your arm/hand  What would you say about your arm/hand  How useful is it to you – is it your dominant arm  In a self-portrait of you, what would your arm/hand look like  How does that make you feel  How did the stroke affect your arm/hand  What are you able to do with your arms and hands – can you give examples  Prompt for:  How would you describe:   - Weakness - Spasticity - Loss of sensation - Pain - Swelling - Skin breakdown - Cuts/bruises - Confidence |
| Can you talk about managing with your (stroke-affected) arm and hand | How do you manage your arm and hand after stroke  What do you do about it  What is important to you  What have you found useful  What is helpful to you  Is there anything in particular you do to look after your arm/hand  What is not important to you  What is not useful to you  What is not helpful to you  Is there anything in particular you avoid  How did you find out about these things  Did you receive any help or guidance on how to manage your arm and hand  Can you give some examples  Prompt for:   - Physiotherapy - Occupational therapy - Medical input, *e.g.* by General Practitioner - Pharmacist, drug store - Electrical stimulation - Positioning advice and aids - Slings, braces, splints and similar supports - Medication - Botox/spasticity clinic - Exercises, stretches |
| Looking back, judging from your experience, what advice would you give someone in your position | What would have been helpful to know  Any tips you would give others in your position  What’s important  From your point of view, what would be the best way to get that information  Prompt for:   - By a professional - By a lay person - By a person who had a stroke themselves - Face-to-face - Group setting (peer support group, informal meeting, other) - Lecture or formal event - Written materials in hardcopy - Online materials - App - Social media (blog, vlog, Twitter, Facebook, other) |
| Can you talk about your (stroke-affected) arm/hand looking ahead | How do you feel about your arm/hand in the future  Are you hopeful about your arm/hand for the future  Is there anything you have in mind  Is there anything you would like to do |
| Is there anything else you would like to mention | Anything we haven’t talked about so far  Anything else that came to mind |
